# Supplementary material for: Effluent Molecular Analysis Guides Liver Graft Allocation to Clinical Hypothermic Oxygenated Machine Perfusion
Source: MDPI journal article supplement (doi:10.3390/biomedicines9101444), 2021-10-11
Supplement: s1 [file s1]

# Supplementary material

## Table of Contents

***Supplementary methods .....2***

    Supplementary Figure S1. Study design. ....2

    Supplementary Figure S2. Calibration curves used to measure concentration of FMN in unknown biological samples.....3

    Supplementary Table S1. Low standards, high standards, and sensitivity of the tests used in the present study to assess analyte concentration in effluent fluids.....4

***Supplementary results.....5***

    Supplementary Figure S3. Color map on correlations across the parameters evaluated in the present study.....5

    Supplementary Table S2. Differences in the molecular profile of effluent fluids of livers from the “EAD-no” and the “EAD-yes” groups. ....6

Supplementary methods

Supplementary Figure S1. Study design.

Schematic representation of effluent fluid collection at the end of the back-table. Liver graft was subjected to cold flush through the portal vein and, after complete cava vein clamping, the effluent was collected using an cannula inserted in the posterior aspect of the retro-hepatic cava vein. A) Timeline of organ donation process and liver preservation; effluent fluid collection is indicated. B) Representative picture showing flushing through the portal vein and the vena cava clamping

A

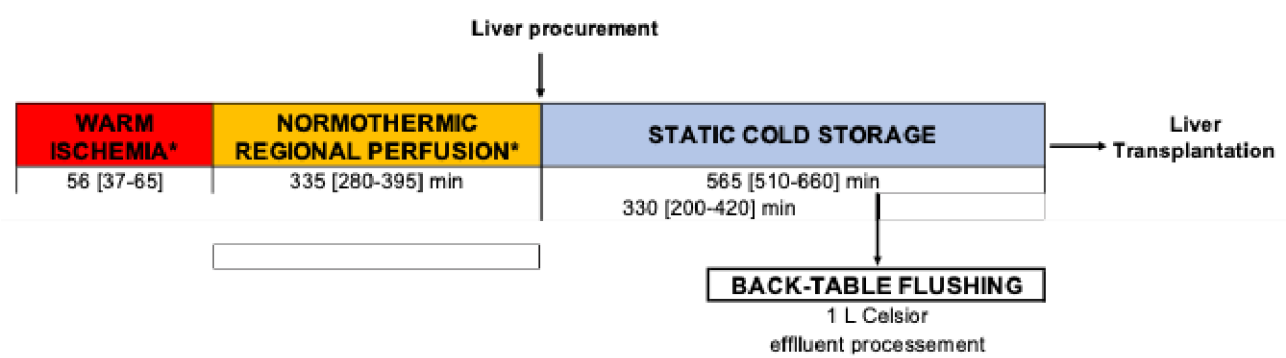

B

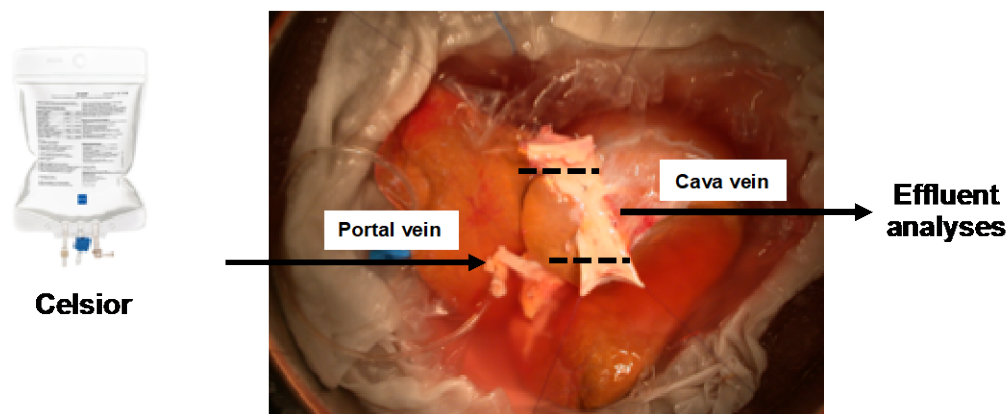

**Supplementary Figure S2. Calibration curves used to measure concentration of FMN in unknown biological samples.**

One hundred fifty microliters of standard samples were dispensed in triplicate in black plates. Excitation wavelength was set at 460/40 nm, while fluorescence emission was revealed with 100% gain at 528/20 nm.

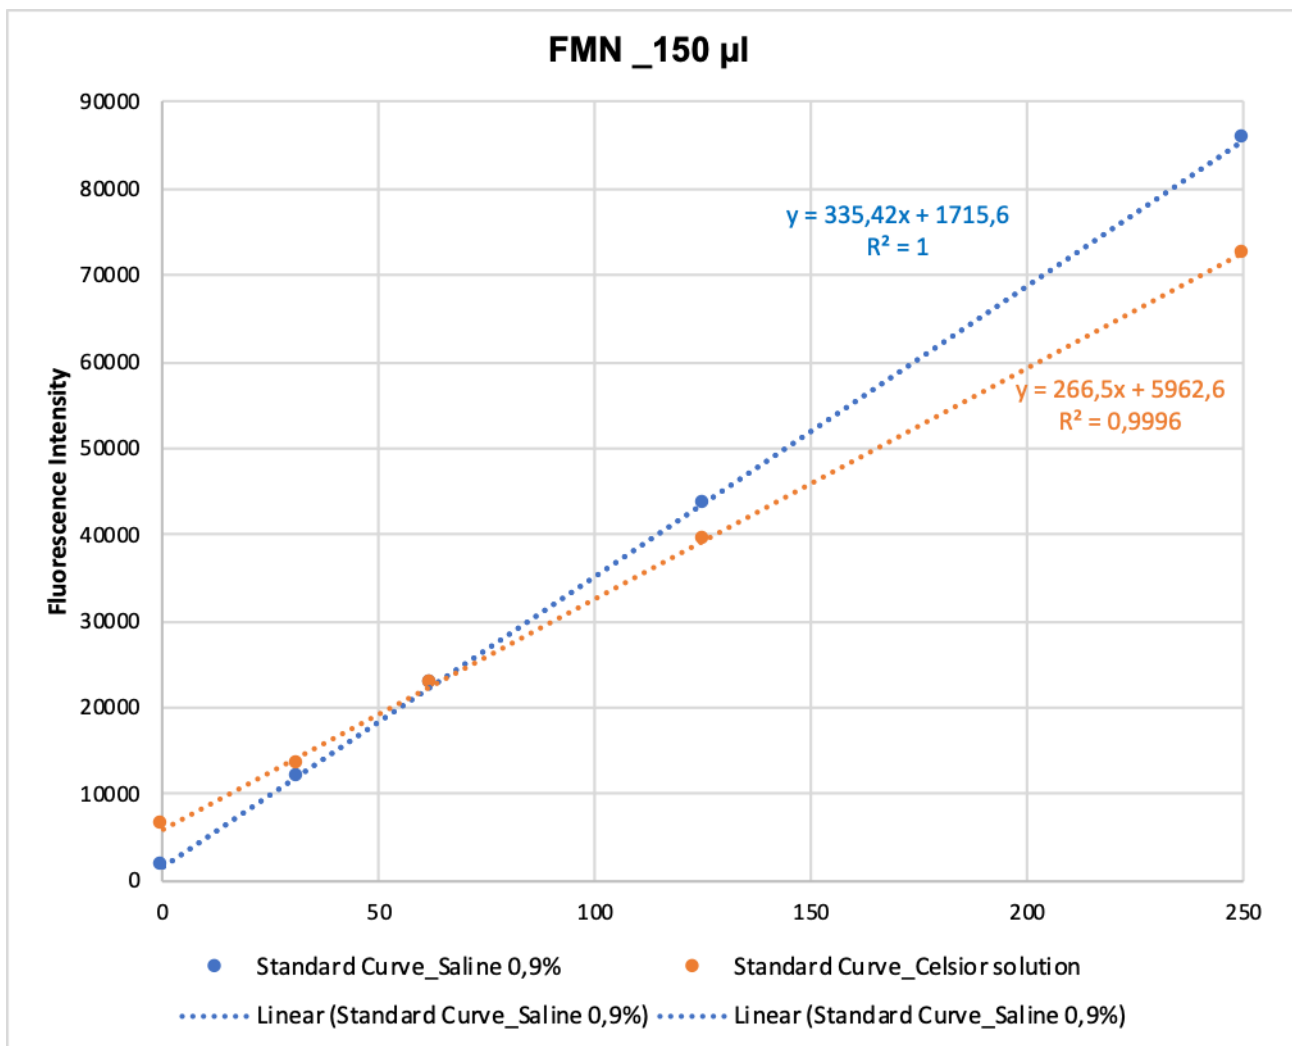

**Supplementary Table S1. Low standards, high standards, and sensitivity of the tests used in the present study to assess analyte concentration in effluent fluids.**

| Analyte                                  | Method                                    | Assay range | Sensitivity | Units | Company     |
|------------------------------------------|-------------------------------------------|-------------|-------------|-------|-------------|
| Angiopoietin-like Protein-3/ANGPTL3      | Human Magnetic Luminex® Screening Assay*  | 267-65000   | 23          | pg/ml | R&D Systems |
| Angiopoietin-like Protein-4/ANGPTL4      | Human Magnetic Luminex® Screening Assay*  | 1850-450000 | 86          | pg/ml | R&D Systems |
| Tumor Necrosis Factor/TNF-alpha          | Human Magnetic Luminex® Screening Assay*  | 8,23-2000   | 1,2         | pg/ml | R&D Systems |
| Coagulation Factor XIV/Protein C         | Human Magnetic Luminex® Screening Assay*  | 206-50000   | 23,1        | pg/ml | R&D Systems |
| Hepatocyte Growth Factor/HGF             | Human Magnetic Luminex® Screening Assay*  | 16,5-4000   | 1           | pg/ml | R&D Systems |
| C-X-C Motif Chemokine Ligand 9/CXCL9/MIG | Human Magnetic Luminex® Screening Assay*  | 617-150000  | 23,8        | pg/ml | R&D Systems |
| C-C Motif Ligand 2/CCL2/MCP-1            | Human Magnetic Luminex® Screening Assay*  | 30,9-7500   | 9,9         | pg/ml | R&D Systems |
| Interleukin 1 beta/IL-1 beta/IL-1F2      | Human Magnetic Luminex® Screening Assay*  | 17,7-4300   | 0,8         | pg/ml | R&D Systems |
| Interleukin 10/IL-10                     | Human Magnetic Luminex® Screening Assay*  | 4,12-1000   | 1,6         | pg/ml | R&D Systems |
| Interleukin 6/IL-6                       | Human Magnetic Luminex® Screening Assay*  | 4,53-1100   | 1,7         | pg/ml | R&D Systems |
| Interleukin 8/IL-8/CXCL8                 | Human Magnetic Luminex® Screening Assay*  | 4,12-1000   | 1,8         | pg/ml | R&D Systems |
| Tumor Necrosis Factor/TNF-alpha          | Enzyme-Linked Immunosorbent Assay (ELISA) | 15,6-1000   | 5,5         | pg/ml | R&D Systems |
| Serpin E1/PAI-1                          | Enzyme-Linked Immunosorbent Assay (ELISA) | 0,313-20    | 0,059       | ng/ml | R&D Systems |
| Galectin-9                               | Enzyme-Linked Immunosorbent Assay (ELISA) | 0,156-10    | 0,08        | ng/ml | R&D Systems |
| Glypican 3                               | Enzyme-Linked Immunosorbent Assay (ELISA) | 78-5000     | 9,18        | pg/ml | R&D Systems |
| Pentraxin3/TSG-14                        | Enzyme-Linked Immunosorbent Assay (ELISA) | 0,313-20    | 0,014       | ng/ml | R&D Systems |
| Hyaluronan                               | Enzyme-Linked Immunosorbent Assay (ELISA) | 0,6-40      | 0,068       | ng/ml | R&D Systems |
| Syndecan-1/CD138                         | Enzyme-Linked Immunosorbent Assay (ELISA) | 8-256       | 4,94        | ng/ml | Diaclone    |

\*Human Premixed Multi-Analyte Kit

Supplementary results

Supplementary Figure S3. Color map on correlations across the parameters evaluated in the present study.

Color scale visually represents values of Pearson correlation coefficients.

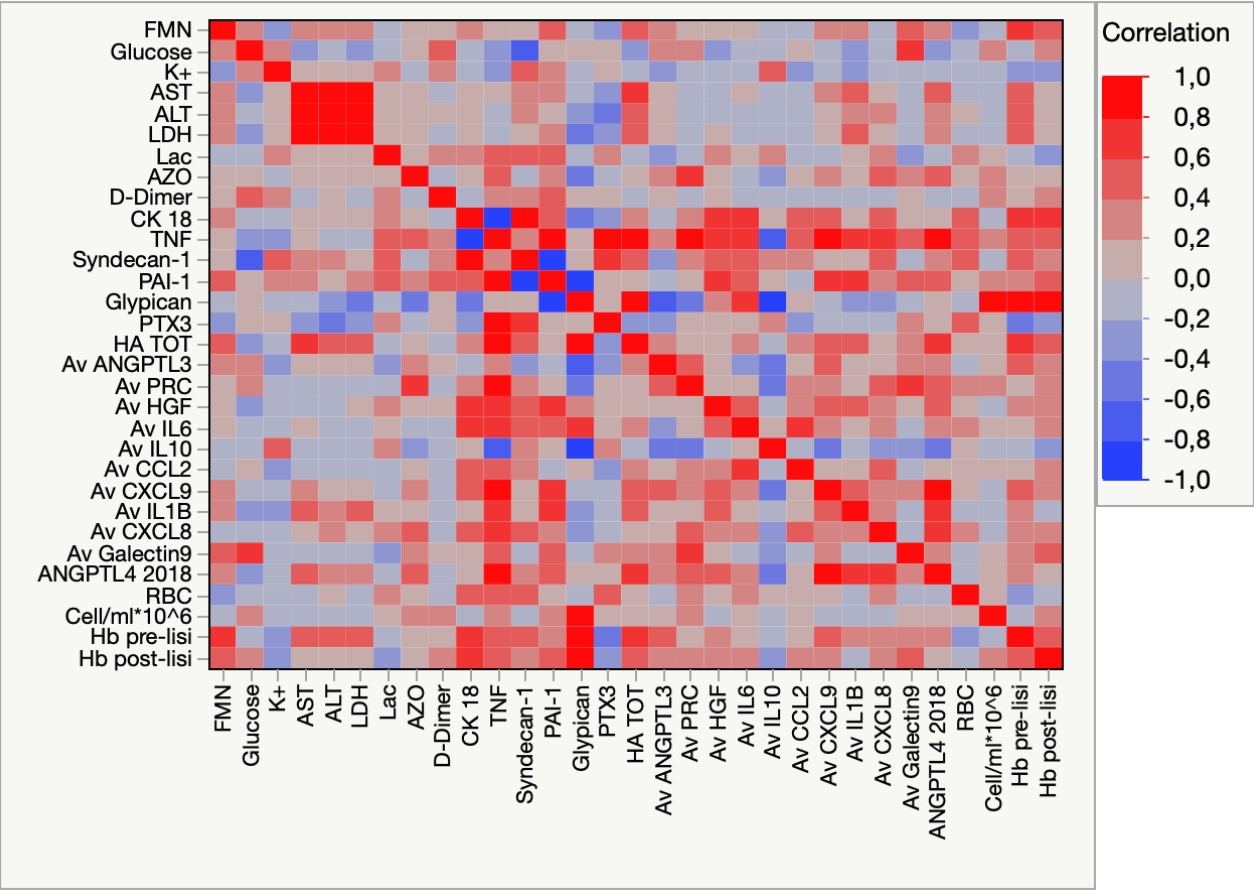

**Supplementary Table S2. Differences in the molecular profile of effluent fluids of livers from the “EAD-no” and the “EAD-yes” groups.**

Results are presented as Median [25-75 percentiles]; p values were calculated using the non-parametric Wilcoxon test.

| Pattern                                 | Variable                  | EAD-no                     | EAD-yes                     | p value       |
|-----------------------------------------|---------------------------|----------------------------|-----------------------------|---------------|
| <b>Inflammation</b>                     |                           |                            |                             |               |
|                                         | CCL2/MCP-1, pg/g          | 136.100 [69.200-238.700]   | 249.500 [62.350-379.925]    | 0.6501        |
|                                         | CXCL8/IL-8, pg/g          | 11.450 [6.000-23.750]      | 9.800 [5.000-23.900]        | 0.8528        |
|                                         | CXCL9/MIG, pg/g           | 79.30 [54.525-115.225]     | 171.000 [25.500-214.975]    | 0.4013        |
|                                         | IL-1b, pg/g               | 4.800 [2.750-8.662]        | 10.000 [4.700-15.250]       | 0.2316        |
|                                         | IL-6, pg/g                | 34.225 [16.100-58.950]     | 42.200 [13.750-64.275]      | 0.9179        |
|                                         | PTX3, ng/g                | 0.0950 [0.0395-0.189]      | 0.0200 [0.0163-0.0957]      | -             |
|                                         | TNF-a, pg/g               | 2.150 [0.400-3.400]        | 1.950 [1.100-3.850]         | 0.8260        |
|                                         | IL-10, pg/g               | 3.250 [0.750-17.700]       | 2.100 [0.650-8.025]         | 0.8851        |
| <b>Resolution, Repair, Regeneration</b> |                           |                            |                             |               |
|                                         | ANGPTL3, pg/g             | 592.700 [321.250-1272.100] | 1238.400 [352.325-1964.475] | 0.4351        |
|                                         | ANGPTL4, ng/g             | 1.000 [0.500-57.200]       | 40.000 [3.575-108.750]      | 0.4694        |
|                                         | Galectin-9, ng/g          | 3.325 [1.200-6.000]        | 5.600 [1.700-6.950]         | 0.6159        |
|                                         | HGF, pg/g                 | 494.600 [367.400-848.025]  | 403.300 [222.700-439.300]   | 0.2305        |
| <b>Coagulation</b>                      |                           |                            |                             |               |
|                                         | Protein C/Factor IX, pg/g | 130.125 [93.000-306.400]   | 160.100 [63.100-218.650]    | 0.7887        |
|                                         | D-dimer, mg/g             | 1.478 [0.757-2.990]        | 1.024 [0.688-2.429]         | 0.3041        |
|                                         | PAI-1, ng/g               | 0.136 [0.0355-0.171]       | 0.138 [0.0450-0.231]        | 0.2986        |
| <b>Hepatocyte injury</b>                |                           |                            |                             |               |
|                                         | CK18, U/g                 | 0.214 [0.151-0.813]        | 1.070 [0.346-3.475]         | 0.4413        |
|                                         | AST, IU/g                 | 0.288 [0.207-0.450]        | 0.708 [0.323-1.415]         | <b>0.0341</b> |
|                                         | ALT, IU/g                 | 0.222 [0.168-0.425]        | 0.553 [0.349-0.976]         | <b>0.0478</b> |
|                                         | LDH, IU/g                 | 0.527 [0.347-0.829]        | 1.320 [0.656-2.496]         | <b>0.0478</b> |
| <b>Liver/hepatocyte metabolism</b>      |                           |                            |                             |               |
|                                         | BUN, mmol/g               | 0.00200 [0.00200-0.00500]  | 0.00200 [0.00100-0.00275]   | 0.1689        |
|                                         | Lac, mmol/g               | 0.00300 [0.00200-0.00300]  | 0.00200 [0.00200-0.00200]   | 0.2766        |
|                                         | FMN, ng/g                 | 33.500 [20.600-50.325]     | 37.600 [33.100-52.000]      | 0.2464        |
| <b>Glycocalyx</b>                       |                           |                            |                             |               |
|                                         | Glypican, pg/g            | 38.688 [24.973-66.222]     | NA                          | -             |
|                                         | HA, ng/g                  | 12.350 [6.900-24.300]      | 34.150 [12.600-108.000]     | 0.1171        |
|                                         | Syndecan-1, pg/g          | 420.200 [283.200-470.600]  | 504.500 [412.050-636.400]   | 0.4014        |
| <b>Other</b>                            |                           |                            |                             |               |
|                                         | K <sup>+</sup> , mmol/g   | 0.0145 [0.0120-0.0160]     | 0.0120 [0.0103-0.0120]      | <b>0.0156</b> |

|                              |                           |                          |        |
|------------------------------|---------------------------|--------------------------|--------|
| Free hemoglobin, mcg/g       | 9.900 [1.100-20.500]      | 21.100 [13.600-23.825]   | 0.0900 |
| WBC, cells/g*10 <sup>6</sup> | 0.600 [0.400-0.975]       | 0.400 [0.200-0.700]      | 0.2973 |
| RBC, cells/g*10 <sup>3</sup> | 362.000 [165.900-568.200] | 151.900 [94.700-269.500] | 0.2023 |

---
